# Supplementary material for: Quantifying the buttressing contribution of landfast sea ice and melange to Crane Glacier, Antarctic Peninsula
Source: Copernicus journal article supplement (doi:10.5194/tc-18-5789-2024), 2024-12-11
Supplement: Supplementary file 1 [file tc-18-5789-2024-supplement.zip]

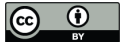

*Supplement of*

## **Quantifying the buttressing contribution of landfast sea ice and melange to Crane Glacier, Antarctic Peninsula**

**Richard Parsons et al.**

*Correspondence to:* Richard Parsons ([richard.parsons@northumbria.ac.uk](mailto:richard.parsons@northumbria.ac.uk))

- [tc-18-5789-2024-supplement-title-page.pdf](#)
- [Supplementary\\_Data.docx](#)

The copyright of individual parts of the supplement might differ from the article licence.
